# Supplementary material for: Upregulation of miR-181c inhibits chemoresistance by targeting ST8SIA4 in chronic myelocytic leukemia
Source: PubMed Central journal article supplement (PMC5312369; doi:10.18632/oncotarget.11054), 2016-08-04
Supplement: oncotarget-07-60074-s001.pdf [file oncotarget-07-60074-s001.pdf]

## Upregulation of miR-181c inhibits chemoresistance by targeting *ST8SIA4* in chronic myelocytic leukemia

### SUPPLEMENTARY TABLE

Supplementary Table S1: Clinicopathologic characteristics of the leukemia patients

| Patients demographics               | Subcategory | CML (n=38) |
|-------------------------------------|-------------|------------|
| Gender                              | Male        | 23         |
|                                     | Female      | 15         |
| Age (years)                         | Median      | 53         |
|                                     | Range       | 18-76      |
| Splenic enlargement                 | –           | 33         |
| Hemoglobin <100.0 g/L               | –           | 12         |
| WBC count (10 <sup>9</sup> /L)      | 20-100      | 22         |
|                                     | >100        | 16         |
| Platelet count (10 <sup>9</sup> /L) | <300        | 17         |
|                                     | >300        | 21         |
| P-gp ( + )                          | –           | 22         |

Abbreviations: CML, chronic myelocytic leukemia; P-gp, P-glycoprotein; WBC, white blood cell.
